# Supplementary material
Source: PubMed Central journal article supplement (PMC3509732)
Supplement: supp_dev.083352_DEV083352.pdf [file supp_dev.083352_DEV083352.pdf]

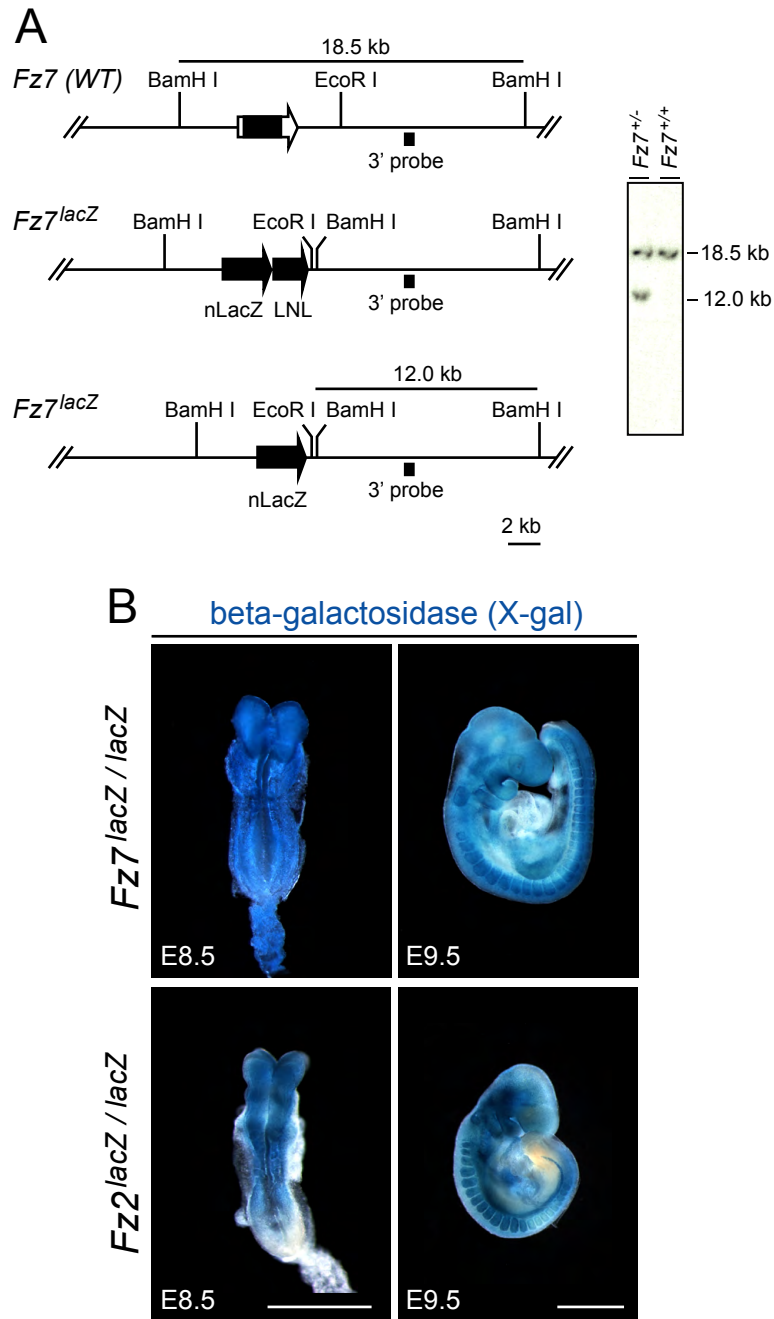

**Fig. S1. *Fz7* knockout strategy and expression patterns of *Fz2<sup>lacZ</sup>* and *Fz7<sup>lacZ</sup>* in early embryos.** (A) Targeted mutation of *Fz7*, with replacement of the *Fz7* coding region with a nuclear-localized *lacZ* (*nlacZ*) coding region. *LNL*, *loxP*-*PGK-neo-loxP* cassette, which was excised by germline Cre-mediated recombination. The 3' Southern blot probe is indicated below the restriction maps, the 18.5 kb (native) and 12.0 kb (targeted) *Bam*HI fragments visualized by Southern blotting with this probe are indicated above the restriction maps, and a representative Southern blot is shown to the right. (B) X-Gal staining of *Fz7<sup>lacZ/lacZ</sup>* and *Fz2<sup>lacZ/lacZ</sup>* embryos at E8.5 (dorsal view) and E9.5 (side view) shows widespread expression of both genes in ectoderm and mesoderm. Scale bars: 1 mm.

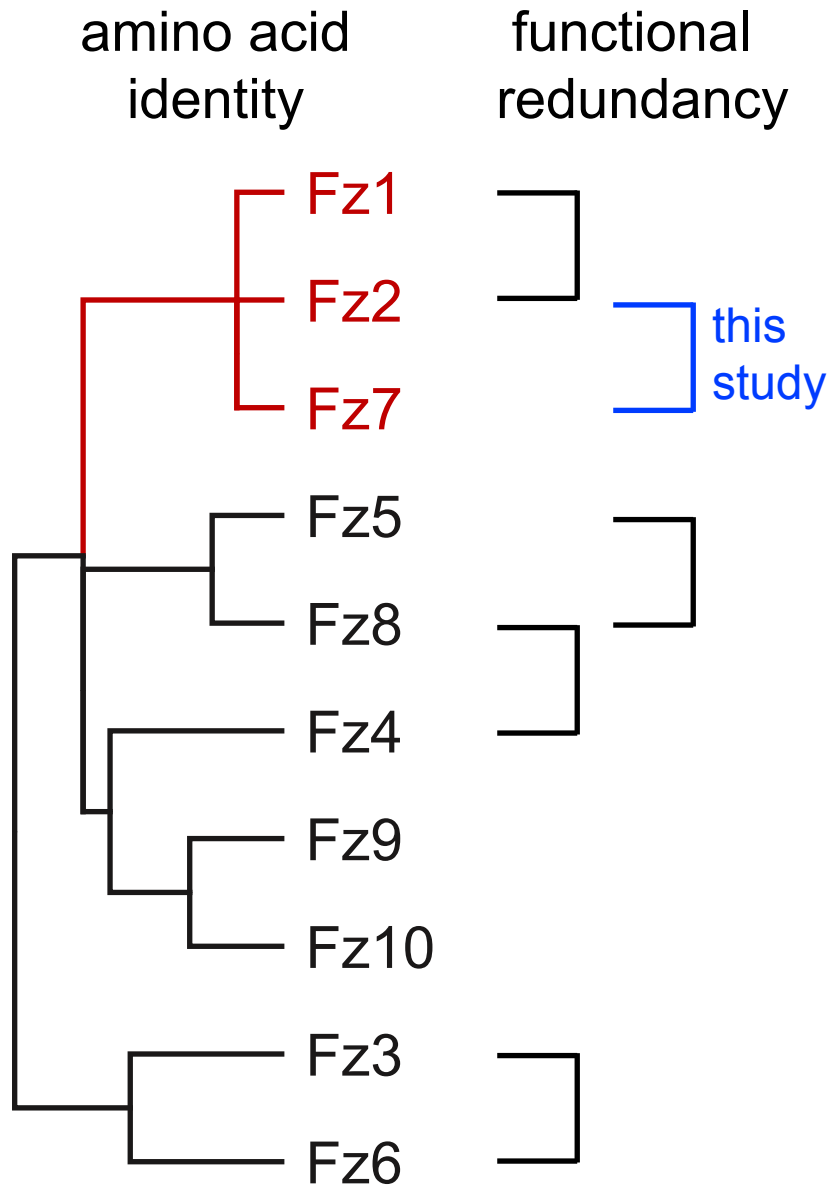

**Fig. S2. Dendrogram showing amino acid sequence identity among mouse Frizzled proteins.** Fz1, Fz2 and Fz7 (red) constitute a distinct branch within the Frizzled family. The dendrograms were generated from multiple sequence alignments produced by MEGA4 software. Previously described functional redundancies among Frizzled family members are indicated by the brackets and are described in the following references: *Fz1/Fz2* (Yu et al., 2010); *Fz3/Fz6* (Wang et al., 2006b); *Fz4/Fz8* (Ye et al., 2011); *Fz5/Fz8* (Liu et al., 2012). The blue bracket represents the *Fz2/Fz7* redundancy described in the present study.

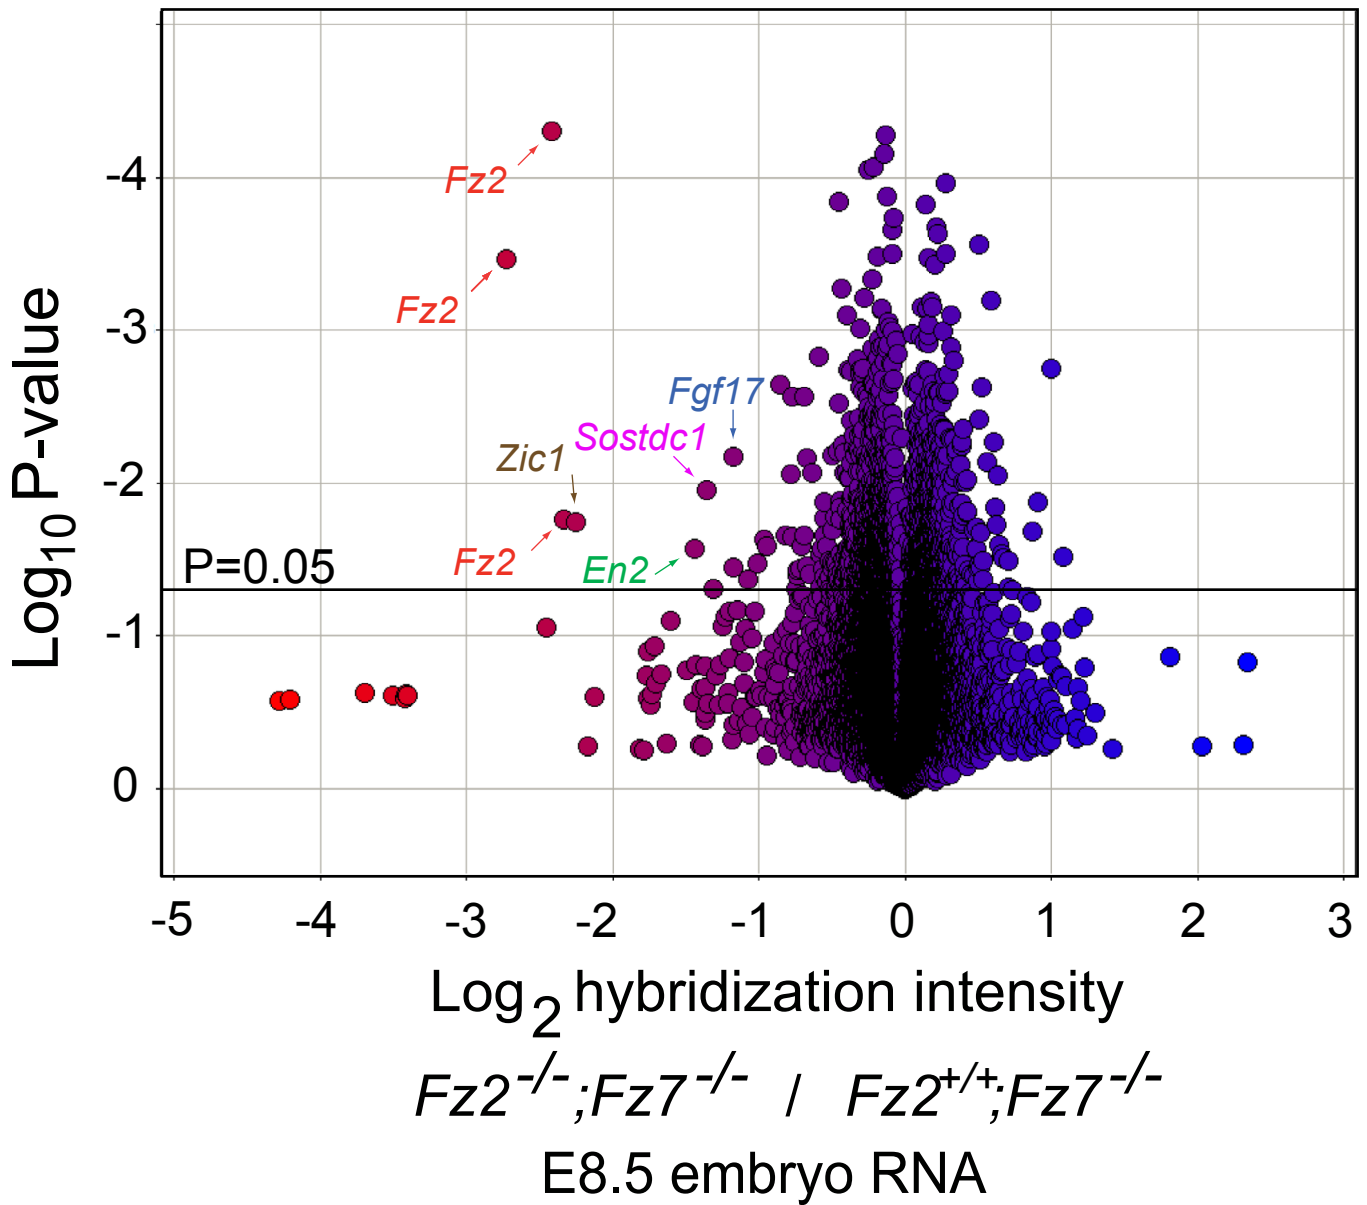

**Fig. S3. Microarray hybridization comparison of E8.5 littermate  $Fz2^{-/-};Fz7^{-/-}$  and  $Fz2^{+/+};Fz7^{-/-}$  transcriptomes.** Volcano plot showing the result of three biologically independent hybridizations to Affymetrix 430 2.0 microarrays, with hybridization intensity ratios plotted on a  $\log_2$  scale, and  $P$ -values plotted on a  $\log_{10}$  scale. The horizontal black line represents  $P=0.05$ . Each transcript is generally represented by multiple sets of oligonucleotide targets, multiple entries in the Affymetrix spreadsheet, and, therefore, multiple points on the volcano plot. The volcano plot shows the expected decrease in the abundance of  $Fz2$  transcripts, which are absent in  $Fz2^{-/-};Fz7^{-/-}$  embryos. The primary data are available at the Gene Expression Omnibus under accession number GSE37221.

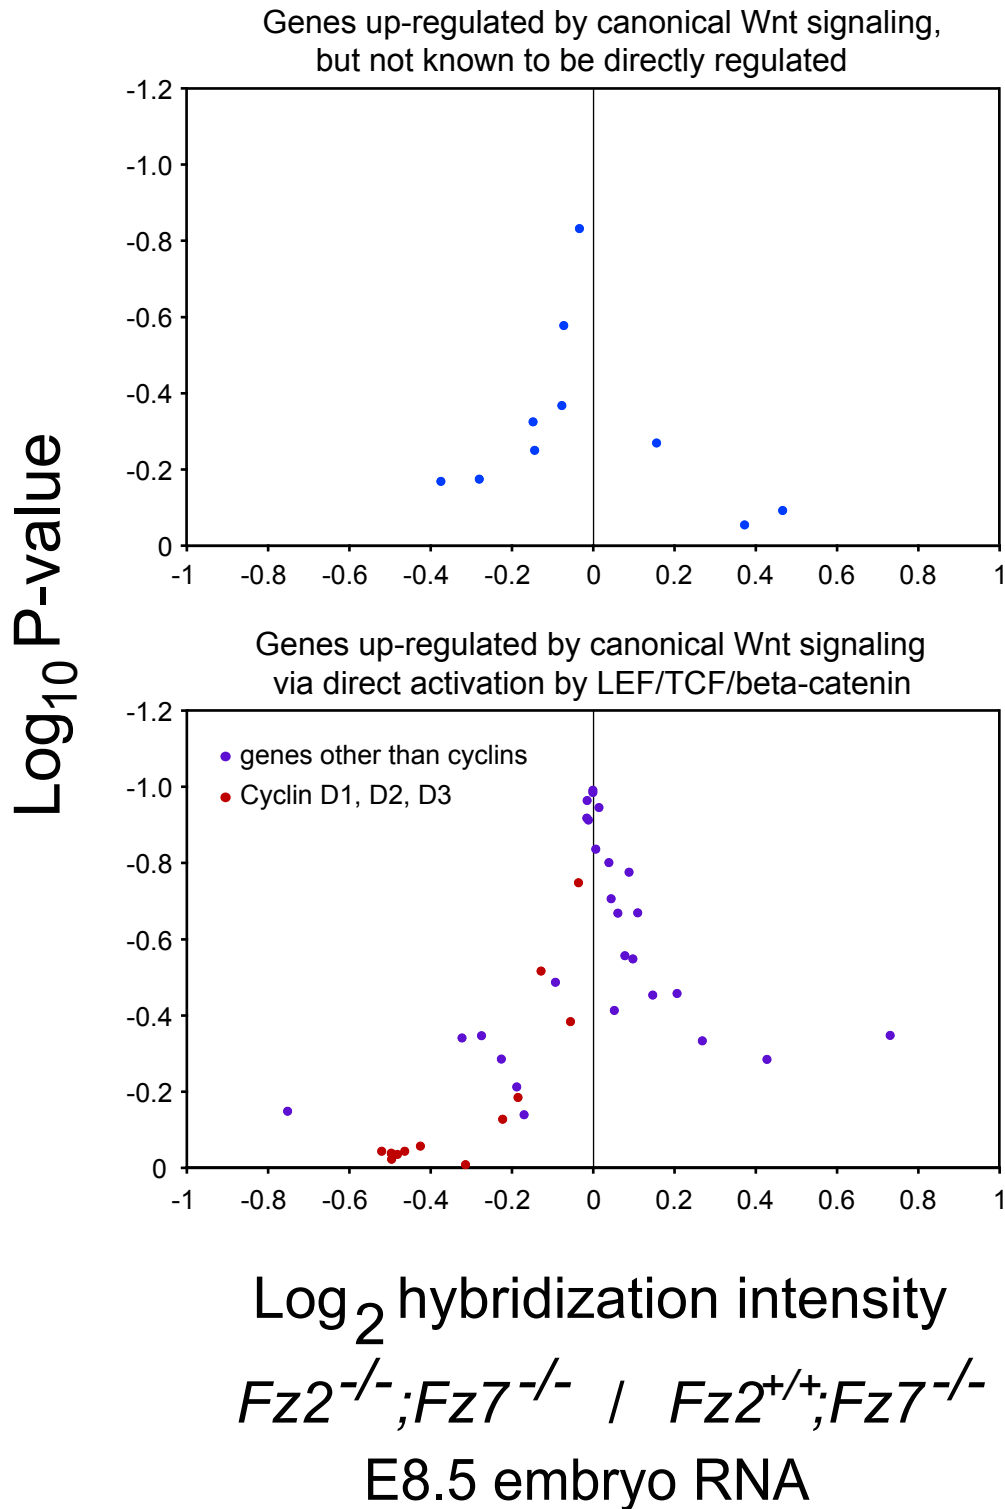

**Fig. S4. Microarray hybridization comparison of E8.5 littermate  $Fz2^{-/-};Fz7^{-/-}$  and  $Fz2^{+/+};Fz7^{-/-}$  for a subset of 25 genes induced by canonical Wnt signaling.** Volcano plots showing the result of three biologically independent hybridizations to Affymetrix 430 2.0 microarrays, with hybridization intensity ratios plotted on a  $\log_2$  scale, and  $P$ -values plotted on a  $\log_{10}$  scale. The 25 Wnt-responsive genes are divided into two plots for those that are (lower plot) or are not (upper plot) known to be direct targets of LEF/TCF/ $\beta$ -catenin signaling (see summary at [http://www.stanford.edu/group/nusselab/cgi-bin/wnt/target\\_genes](http://www.stanford.edu/group/nusselab/cgi-bin/wnt/target_genes)). Each transcript is generally represented by multiple sets of oligonucleotide targets, multiple entries in the Affymetrix spreadsheet, and, therefore, multiple points on the volcano plot (see Table S1). Data points corresponding to Cyclin D family members, which have the largest number of probe sets, are color-coded red.

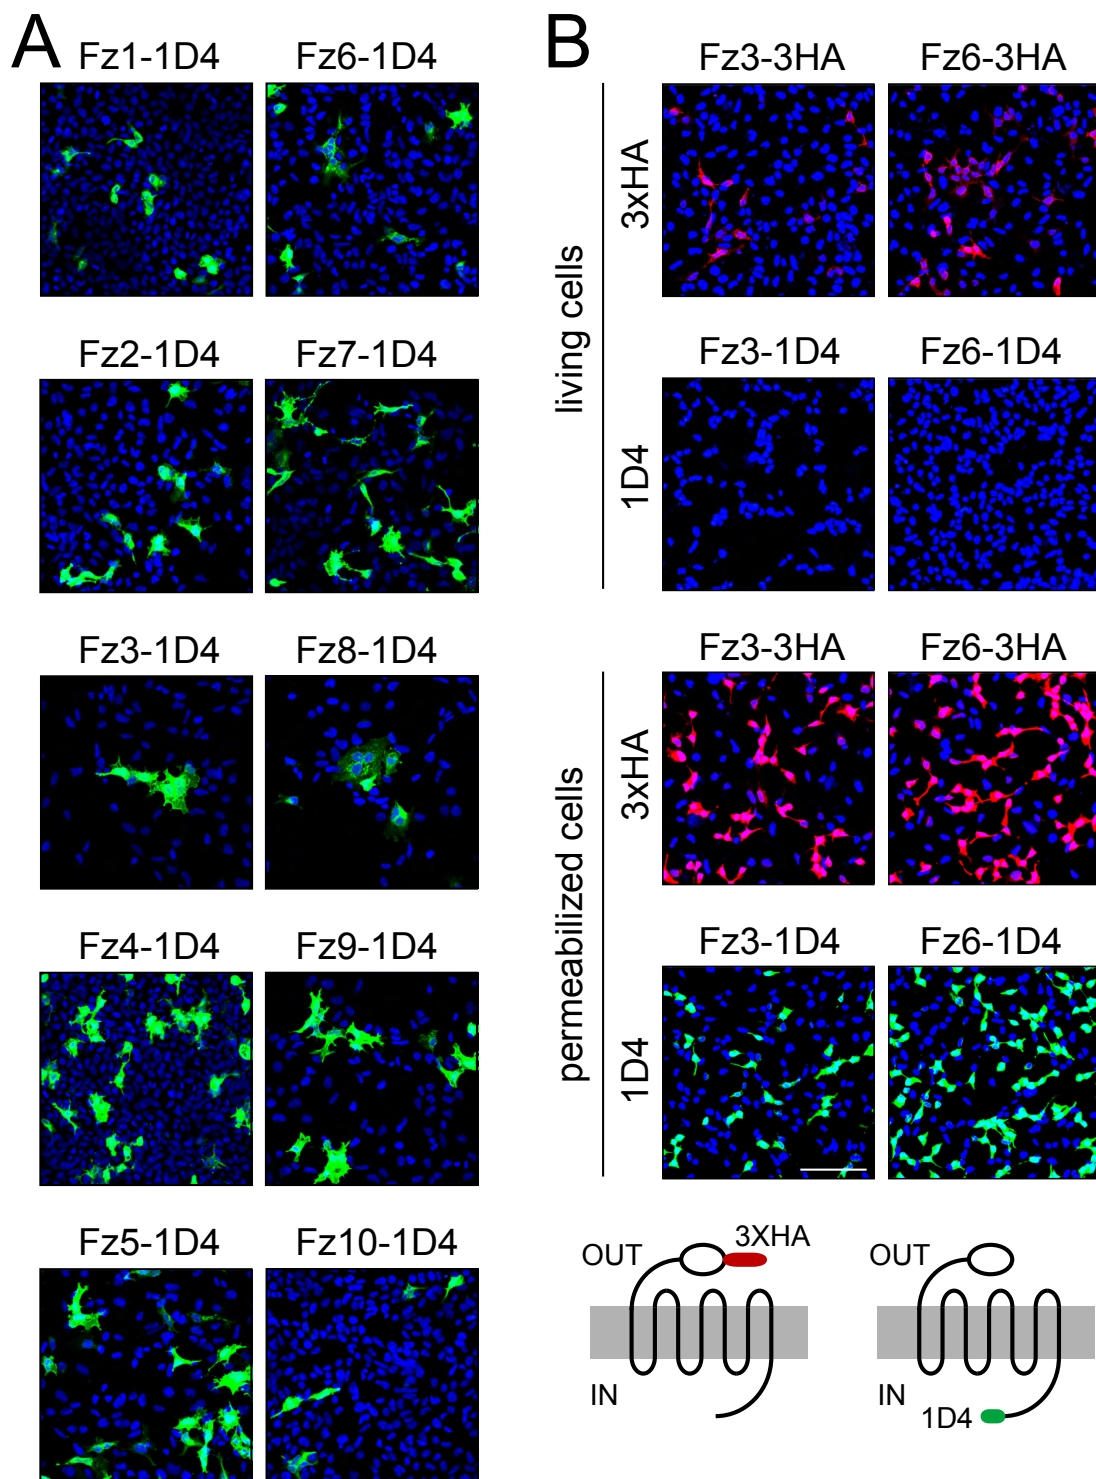

**Fig. S5. Analysis of expression of Fz1-Fz10 and cell surface localization of Fz3 and Fz6 in HEK293 cells.** (A) HEK293 cells transiently transfected with plasmids coding for 1D4 C-terminal epitope-tagged Fz1 through Fz10 were fixed, permeabilized with Triton X-100, and immunostained with mAb 1D4. Transfection and immunostaining were performed in parallel with common reagent mixes, confocal imaging was performed with identical settings, and image processing was performed with identical parameters. (B) HEK293 cells transiently transfected with plasmids coding for epitope-tagged Fz3 or Fz6 proteins (diagramed beneath) were incubated with primary antibodies under one of two conditions: (1) as living cells, followed by paraformaldehyde fixation or (2) following paraformaldehyde fixation and permeabilization. For all samples, secondary antibody binding was conducted under permeabilizing conditions. For each antibody, permeabilized and non-permeabilized confocal imaging was performed with identical settings. For all images, image processing was performed with identical parameters. The failure of mAb 1D4 to stain living cells is consistent with the intracellular localization of this C-terminal epitope. The lower level of 3×HA binding to living cells compared with fixed and permeabilized cells is likely to reflect a combination of the accumulation of the majority of Fz3 and Fz6 within the secretory pathway and the ~15× shorter primary antibody incubation time used for living cells compared with permeabilized cells. Scale bar: 100 μm.

**Table S1. Transcript abundance changes in *Fz2*<sup>-/-</sup> versus *Fz2*<sup>-/-</sup>;*Fz7*<sup>-/-</sup> E8.5 embryos among 25 genes known to be induced by canonical Wnt signaling**

Shown are Affymetrix probe set ID and gene symbol, the average hybridization intensity changes based on three independent sets of *Fz2*<sup>-/-</sup> versus *Fz2*<sup>-/-</sup>;*Fz7*<sup>-/-</sup> E8.5 embryos, and the *P*-value of the resulting fold change versus the null hypothesis of no change. The numbers to the left refer to the row number in the full microarray hybridization data set (GEO accession number GSE37221). The 25 genes are divided into those known to be directly regulated by canonical Wnt signaling (i.e. by LEF/TCF/beta-catenin binding to DNA target sequences) (19/25 genes, upper table) and those not known to be directly regulated (6/25 genes, lower table); Wnt induction data are summarized at [http://www.stanford.edu/group/nusselab/cgi-bin/wnt/target\\_genes](http://www.stanford.edu/group/nusselab/cgi-bin/wnt/target_genes).

**Genes directly upregulated by LEF/TCF/beta-catenin**

| Number | log <sub>2</sub> fold change | Fold change  | <i>P</i> -value | Probe set ID | Gene symbol     |
|--------|------------------------------|--------------|-----------------|--------------|-----------------|
| 9249   | -0.223984329                 | -1.167954708 | 0.28289708      | 1424942_a_at | <i>Myc</i>      |
| 17778  | -0.090327432                 | -1.064611778 | 0.48436968      | 1433471_at   | <i>Tcf7</i>     |
| 34757  | 0.001656169                  | 1.001148628  | 0.988533869     | 1450461_at   | <i>Tcf7</i>     |
| 5606   | 0.090918542                  | 1.065048066  | 0.773563439     | 1421299_a_at | <i>Lef1</i>     |
| 39030  | -0.185546083                 | -1.137247358 | 0.210292884     | 1454734_at   | <i>Lef1</i>     |
| 7221   | 0.208727406                  | 1.155668325  | 0.45537026      | 1422914_at   | <i>Sp5</i>      |
| 34550  | 0.054642591                  | 1.038601772  | 0.410765538     | 1450254_at   | <i>Tert</i>     |
| 5648   | 0.046504224                  | 1.032759424  | 0.703458327     | 1421341_at   | <i>Axin2</i>    |
| 21152  | -0.013186043                 | -1.009181764 | 0.915578236     | 1436845_at   | <i>Axin2</i>    |
| 1741   | -0.272225812                 | -1.207669602 | 0.344053198     | 1417409_at   | <i>Jun</i>      |
| 32995  | -0.320745097                 | -1.248975431 | 0.338574059     | 1448694_at   | <i>Jun</i>      |
| 28826  | 0.001448836                  | 1.001004761  | 0.98269741      | 1444519_at   | <i>Lgr5</i>     |
| 35284  | -0.01272021                  | -1.008855962 | 0.96171315      | 1450988_at   | <i>Lgr5</i>     |
| 3636   | 0.270671496                  | 1.206369196  | 0.331107416     | 1419304_at   | <i>T</i>        |
| 4644   | 0.429942093                  | 1.347179502  | 0.28178972      | 1420337_at   | <i>Gbx2</i>     |
| 33883  | 0.733043422                  | 1.662141749  | 0.344896614     | 1449582_at   | <i>Cdx1</i>     |
| 253    | 0.100157776                  | 1.07189068   | 0.545620612     | 1415921_a_at | <i>Tnfrsf19</i> |
| 9519   | 0.148432793                  | 1.108364796  | 0.451139341     | 1425212_a_at | <i>Tnfrsf19</i> |
| 32448  | 0.016499704                  | 1.011502373  | 0.94265723      | 1448147_at   | <i>Tnfrsf19</i> |
| 33779  | 0.008333558                  | 1.005793097  | 0.833733354     | 1449478_at   | <i>Mmp7</i>     |
| 10010  | -0.00946854                  | -1.006584676 | 0.910097025     | 1425703_at   | <i>Ppard</i>    |
| 24104  | -0.167938773                 | -1.123452224 | 0.136555917     | 1439797_at   | <i>Ppard</i>    |
| 10719  | 0.062984217                  | 1.044624334  | 0.66564989      | 1426412_at   | <i>Neurod1</i>  |
| 10720  | 0.080008756                  | 1.057024456  | 0.554530867     | 1426413_at   | <i>Neurod1</i>  |
| 5419   | 0.112143264                  | 1.080832726  | 0.666845523     | 1421112_at   | <i>Nkx2-2</i>   |
| 22858  | -0.749572674                 | -1.681294758 | 0.14571802      | 1438551_at   | <i>Neurog1</i>  |
| 35132  | 0.040716663                  | 1.028624672  | 0.798325162     | 1450836_at   | <i>Neurog1</i>  |
| 1751   | -0.125847545                 | -1.091148565 | 0.514050518     | 1417419_at   | <i>Ccnd1</i>    |
| 1752   | -0.22043166                  | -1.165082131 | 0.125036228     | 1417420_at   | <i>Ccnd1</i>    |
| 32999  | -0.31180544                  | -1.241260085 | 0.006021336     | 1448698_at   | <i>Ccnd1</i>    |
| 454    | -0.479296827                 | -1.39406403  | 0.032819728     | 1416122_at   | <i>Ccnd2</i>    |
| 455    | -0.461771304                 | -1.37723171  | 0.041111246     | 1416123_at   | <i>Ccnd2</i>    |

|       |              |              |             |              |              |
|-------|--------------|--------------|-------------|--------------|--------------|
| 456   | -0.518002713 | -1.431971434 | 0.041384851 | 1416124_at   | <i>Ccnd2</i> |
| 14343 | -0.49468802  | -1.409016025 | 0.036310447 | 1430127_a_at | <i>Ccnd2</i> |
| 19052 | -0.4226797   | -1.340414966 | 0.054573644 | 1434745_at   | <i>Ccnd2</i> |
| 32530 | -0.493894403 | -1.408241148 | 0.020480653 | 1448229_s_at | <i>Ccnd2</i> |
| 40252 | -0.493286247 | -1.40764764  | 0.033099878 | 1455956_x_at | <i>Ccnd2</i> |
| 239   | -0.18298923  | -1.135233627 | 0.18261158  | 1415907_at   | <i>Ccnd3</i> |
| 23112 | -0.034170701 | -1.02396805  | 0.745531307 | 1438805_at   | <i>Ccnd3</i> |
| 28630 | -0.053213277 | -1.037573312 | 0.381066095 | 1444323_at   | <i>Ccnd3</i> |

**Genes upregulated by canonical Wnt signaling, but not known to be directly controlled by LEF/TCF/beta-catenin**

| Number | log <sub>2</sub> fold change | Fold change  | P-value     | Probe set ID | Gene symbol   |
|--------|------------------------------|--------------|-------------|--------------|---------------|
| 10229  | -0.031643168                 | -1.022175677 | 0.834837614 | 1425922_a_at | <i>Mycn</i>   |
| 10230  | -0.074839608                 | -1.053243935 | 0.370151246 | 1425923_at   | <i>Mycn</i>   |
| 2119   | 0.157889939                  | 1.115654208  | 0.272391433 | 1417787_at   | <i>Dkk1</i>   |
| 9257   | -0.372285003                 | -1.294401337 | 0.171519097 | 1424950_at   | <i>Sox9</i>   |
| 18196  | -0.069787667                 | -1.0495622   | 0.580000591 | 1433889_at   | <i>Sox9</i>   |
| 35834  | -0.277903713                 | -1.212431897 | 0.177249344 | 1451538_at   | <i>Sox9</i>   |
| 5964   | 0.374839047                  | 1.296694882  | 0.05674946  | 1421657_a_at | <i>Sox17</i>  |
| 13484  | 0.468411795                  | 1.383585496  | 0.095193624 | 1429177_x_at | <i>Sox17</i>  |
| 3536   | -0.141376469                 | -1.102956941 | 0.252686238 | 1419204_at   | <i>Dll1</i>   |
| 3065   | -0.14528704                  | -1.105950673 | 0.327187884 | 1418733_at   | <i>Twist1</i> |

**Table S2. STF reporter assay of canonical Wnt signaling**

Data are the averages of three transfections and have been normalized for the cotransfected *Renilla* luciferase.

## Fz+Lrp5

|      |      |
|------|------|
| Fz1  | 0.48 |
| Fz2  | 0.37 |
| Fz3  | 0.76 |
| Fz4  | 2.54 |
| Fz5  | 0.46 |
| Fz6  | 0.7  |
| Fz7  | 1.02 |
| Fz8  | 0.85 |
| Fz9  | 16.3 |
| Fz10 | 0.26 |

## Wnt+Lrp5

|        |        |
|--------|--------|
| Wnt1   | 140.8  |
| Wnt2   | 4.08   |
| Wnt2b  | 0.19   |
| Wnt3   | 11.18  |
| Wnt3a  | 13.57  |
| Wnt4   | 0.35   |
| Wnt5a  | 0.18   |
| Wnt5b  | 0.14   |
| Wnt6   | 0.204  |
| Wnt7a  | 0.715  |
| Wnt7b  | 2.082  |
| Wnt8a  | 0.342  |
| Wnt8b  | 0.351  |
| Wnt9a  | 0.193  |
| Wnt9b  | 1.329  |
| Wnt10a | 0.356  |
| Wnt10b | 14.706 |
| Wnt11  | 0.18   |
| Wnt16  | 0.583  |

## Wnt+Fz+Lrp5 (not normalized for Wnt+Lrp5 and Fz+Lrp5)

|       | Fz1   | Fz2   | Fz3    | Fz4   | Fz5   |
|-------|-------|-------|--------|-------|-------|
| Wnt1  | 92.91 | 82.82 | 140.46 | 87.6  | 107.9 |
| Wnt2  | 11.38 | 25.87 | 1.74   | 27.06 | 42.54 |
| Wnt2b | 1.43  | 1.26  | 1.18   | 6.69  | 12.39 |
| Wnt3  | 102.8 | 75.06 | 5.22   | 44.43 | 76.9  |
| Wnt3a | 102   | 63.5  | 14.11  | 32.8  | 63.4  |
| Wnt4  | 0.72  | 0.44  | 0.37   | 2.56  | 0.51  |
| Wnt5a | 0.59  | 0.41  | 0.27   | 4.1   | 1.2   |
| Wnt5b | 0.68  | 0.68  | 0.7    | 7.14  | 1.21  |
| Wnt6  | 5.39  | 2.87  | 0.45   | 13.09 | 18.59 |
| Wnt7a | 9.97  | 8.44  | 1.15   | 9.07  | 75.82 |
| Wnt7b | 37    | 27.9  | 2.79   | 40.35 | 152.3 |



|        |       |       |       |       |       |
|--------|-------|-------|-------|-------|-------|
| Wnt8a  | 4.49  | 4.49  | 0.92  | 11.75 | 28.72 |
| Wnt8b  | 0.98  | 2     | 1.34  | 9.49  | 21.01 |
| Wnt9a  | 0.89  | 0.47  | 0.58  | 2.01  | 0.64  |
| Wnt9b  | 6.77  | 2.79  | 1.26  | 27.35 | 68.8  |
| Wnt10a | 3.43  | 1.65  | 1.22  | 9.08  | 8.03  |
| Wnt10b | 29.61 | 34.37 | 18.38 | 47.73 | 53.23 |
| Wnt11  | 0.44  | 0.56  | 1.27  | 17.5  | 0.82  |
| Wnt16  | 0.77  | 0.87  | 0.96  | 8.58  | 1.27  |

|        | Fz6  | Fz7   | Fz8    | Fz9    | Fz10  |
|--------|------|-------|--------|--------|-------|
| Wnt1   | 98.8 | 57.89 | 170.79 | 129.5  | 170.1 |
| Wnt2   | 1.05 | 25.43 | 72.58  | 55.23  | 7.46  |
| Wnt2b  | 0.86 | 2.69  | 22.4   | 18.23  | 0.94  |
| Wnt3   | 4.19 | 76.14 | 49.12  | 37.36  | 18.94 |
| Wnt3a  | 21.4 | 79.36 | 55.09  | 37.73  | 39.17 |
| Wnt4   | 0.9  | 0.98  | 0.5    | 11.18  | 0.37  |
| Wnt5a  | 0.82 | 1.02  | 0.93   | 15.34  | 0.19  |
| Wnt5b  | 1.75 | 1.49  | 1.15   | 17.3   | 0.27  |
| Wnt6   | 0.85 | 3.85  | 17.8   | 9.83   | 1.91  |
| Wnt7a  | 0.97 | 13.39 | 55.36  | 23.5   | 1.15  |
| Wnt7b  | 1.04 | 35.95 | 118.9  | 49.3   | 4.38  |
| Wnt8a  | 0.89 | 6.94  | 39.55  | 22.13  | 2.29  |
| Wnt8b  | 0.94 | 2.74  | 47.96  | 17.9   | 0.49  |
| Wnt9a  | 0.88 | 0.92  | 1.08   | 13.04  | 0.63  |
| Wnt9b  | 1.96 | 4.85  | 37.51  | 126.61 | 15.7  |
| Wnt10a | 0.84 | 5.16  | 2.73   | 20.21  | 0.78  |
| Wnt10b | 5.2  | 36.19 | 36     | 58.5   | 32.03 |
| Wnt11  | 0.83 | 1.64  | 1.9    | 18.04  | 0.64  |
| Wnt16  | 0.8  | 2.26  | 0.74   | 32.25  | 0.77  |

Wnt+Fz+Lrp5 (normalized for Wnt+Lrp5 and Fz+Lrp5)

|        | Fz1   | Fz2   | Fz3  | Fz4   | Fz5   |
|--------|-------|-------|------|-------|-------|
| Wnt1   | 0.85  | 0.76  | 1.03 | 0.83  | 1.03  |
| Wnt2   | 3.22  | 6.49  | 0.49 | 4.45  | 11.41 |
| Wnt2b  | 2.03  | 2.07  | 1.37 | 2.83  | 18.46 |
| Wnt3   | 11.98 | 7.68  | 0.56 | 4.05  | 8.55  |
| Wnt3a  | 8.13  | 5.71  | 0.83 | 2.15  | 5.13  |
| Wnt4   | 0.82  | 0.51  | 0.37 | 0.99  | 0.53  |
| Wnt5a  | 0.89  | 0.64  | 0.44 | 1.3   | 1.12  |
| Wnt5b  | 0.95  | 1.12  | 0.79 | 2.95  | 1.7   |
| Wnt6   | 9.45  | 6.07  | 0.64 | 11.28 | 34.93 |
| Wnt7a  | 4.39  | 5.6   | 0.73 | 1.51  | 46.97 |
| Wnt7b  | 12.45 | 10.86 | 0.87 | 5.63  | 51.27 |
| Wnt8a  | 6.27  | 6.41  | 0.84 | 4.81  | 40.56 |
| Wnt8b  | 1.34  | 2.98  | 1.23 | 2.95  | 27.1  |
| Wnt9a  | 1.58  | 0.95  | 0.64 | 0.75  | 0.99  |
| Wnt9b  | 4.03  | 1.95  | 0.75 | 8.99  | 38.78 |
| Wnt10a | 4.73  | 2.59  | 1.08 | 2.83  | 10.06 |
| Wnt10b | 4.52  | 2.75  | 1.28 | 2.92  | 4.37  |
| Wnt11  | 0.91  | 1.28  | 1.51 | 7.03  | 1.28  |

|        |       |      |       |      |       |
|--------|-------|------|-------|------|-------|
| Wnt16  | 0.85  | 0.98 | 0.81  | 3.35 | 1.13  |
|        | Fz6   | Fz7  | Fz8   | Fz9  | Fz10  |
| Wnt1   | 0.7   | 0.53 | 1.34  | 1.05 | 1.34  |
| Wnt2   | 0.28  | 5.21 | 17.63 | 2.81 | 1.93  |
| Wnt2b  | 0.66  | 2.11 | 21.16 | 1.49 | 1.96  |
| Wnt3   | 0.95  | 8.11 | 6.09  | 1.3  | 2.08  |
| Wnt3a  | 0.91  | 5.67 | 4.28  | 1.5  | 3.06  |
| Wnt4   | 0.7   | 0.78 | 0.39  | 0.81 | 0.53  |
| Wnt5a  | 0.76  | 0.81 | 0.77  | 1.12 | 0.42  |
| Wnt5b  | 22.25 | 1.15 | 0.98  | 1.15 | 0.72  |
| Wnt6   | 0.38  | 5.38 | 20.4  | 1.11 | 4.5   |
| Wnt7a  | 1.11  | 4.74 | 22.66 | 0.87 | 1.25  |
| Wnt7b  | 1.51  | 8.27 | 30.13 | 1.57 | 1.81  |
| Wnt8a  | 0.89  | 5.72 | 32.45 | 1.54 | 3.72  |
| Wnt8b  | 1.23  | 1.83 | 35.82 | 1.09 | 1.03  |
| Wnt9a  | 1.02  | 0.82 | 0.92  | 0.87 | 1.43  |
| Wnt9b  | 0.89  | 2.15 | 18.12 | 8.39 | 13.26 |
| Wnt10a | 0.63  | 3.77 | 2.23  | 1.37 | 1.63  |
| Wnt10b | 0.8   | 2.42 | 3.13  | 1.89 | 2.54  |
| Wnt11  | 1.06  | 1.29 | 1.41  | 1.2  | 1.68  |
| Wnt16  | 0.48  | 1.67 | 0.42  | 2.21 | 0.86  |
